# Supplementary material for: Optimizing NCM811 nickel-rich cathode stability via suppressing asymmetric Li/Ni mixing by a “non-intrusive” strategy
Source: Royal Society of Chemistry journal article supplement (doi:10.1039/d3ta07698a), 2024-01-01
Supplement: d3ta07698a1.pdf [file d3ta07698a1.pdf]

## Supplementary Information

### Optimizing NCM811 Nickel-Rich Cathode Stability via Suppressing Asymmetric Li/Ni Mixing By "Non-Intrusive" Strategy

*Boyuan Zhu<sup>a,b,c</sup>, He Li<sup>a,b,c</sup>, Yadong Ning<sup>a,b,c</sup>, Zihui Yu<sup>a,b</sup>, Long Meng<sup>a,b</sup>, Guangye Wei<sup>\*a,b</sup>,*

*Jingkui Qu<sup>\*a,b</sup>*

<sup>a</sup> National Engineering Research Center of Green Recycling for Strategic Metal Resources,

Beijing 100190, China

<sup>b</sup> Institute of Process Engineering, Chinese Academy of Sciences, Beijing 100190, China

<sup>c</sup> University of Chinese Academy of Sciences, Beijing 100049, China

\* Corresponding author: Institute of Process Engineering, Chinese Academy of Sciences, Beijing

100190, China

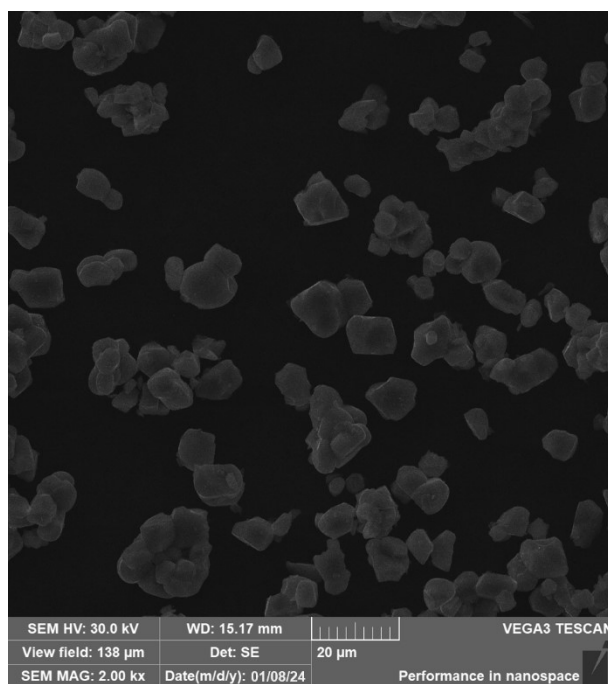

**Figure S1.** SEM images of single crystal sample S-S obtained by sintering at 950 °C.

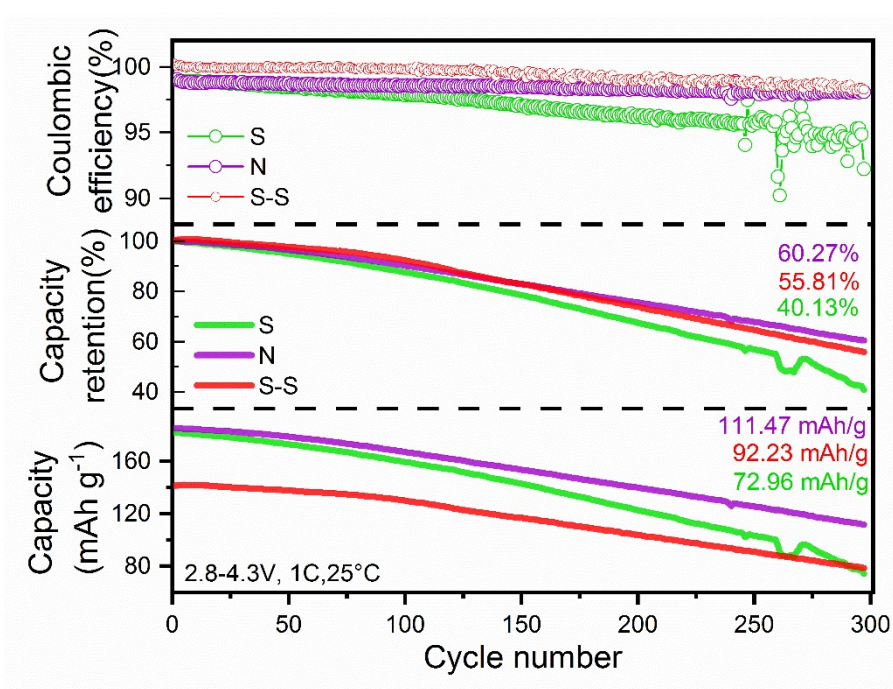

**Figure S2.** The coulombic efficiency, cycling performance and cycling capacity retentions at 1C for sample S, N and S-S in the cell potential of 2.8-4.3 V at 25 °C.

Both the modified sample N and the single crystal sample S-S exhibit the ability to maintain high Coulombic efficiency, particularly after 150 cycles. The capacity

retention rate change curve also demonstrates a similar trend, with the modified sample showing improved capacity retention rates after extended cycles compared to the single crystal sample S-S, increasing from 55.81% to 60.27%. Due to the polycrystalline morphology of the modified sample, it demonstrates superior capacity performance compared to single crystal samples. The modified sample combines the advantages of high capacity of polycrystalline morphology and the high stability of single crystal morphology.

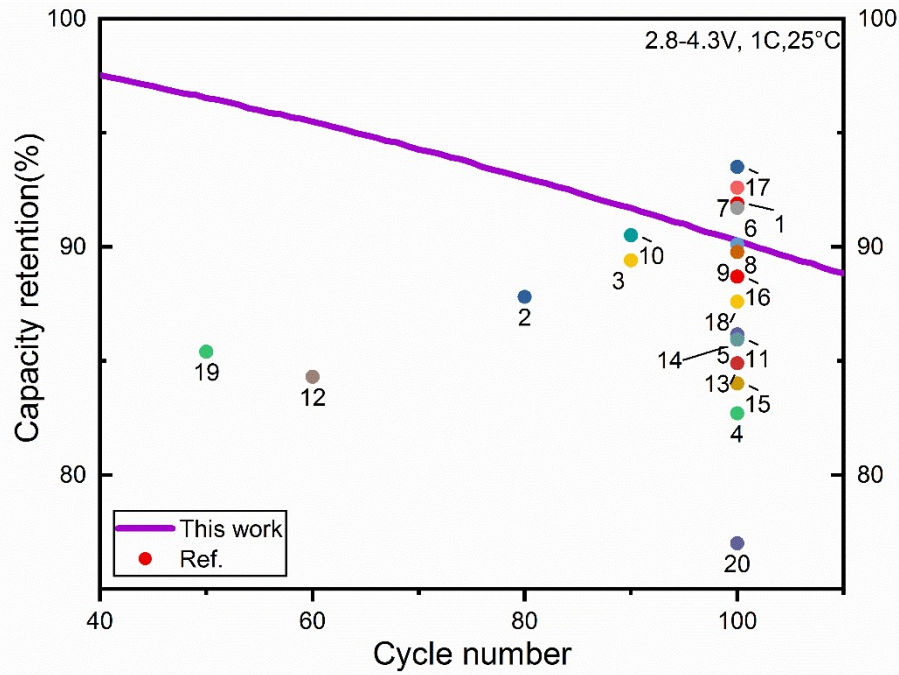

**Figure S3.** Comparison of the capacity retention rate of modified samples in this work with some reported literature (Half-cell vs Li/Li<sup>+</sup>, 2.8-4.3V, 25°C, 1C=200 mA g<sup>-1</sup>).

**Table S1.** Detailed information of the data points referenced in Figure S3.

| NO. | Category       | Strategy                                                                                      | Ref. | C-rate |
|-----|----------------|-----------------------------------------------------------------------------------------------|------|--------|
| 1   | single crystal | Surface modification                                                                          | 1    | 1C     |
| 2   | polycrystal    | Carbon coating                                                                                | 2    | 0.5C   |
| 3   | polycrystal    | Li <sub>2</sub> SnO <sub>3</sub> -Ag coating                                                  | 3    | 1C     |
| 4   | polycrystal    | Na-doping and MgF <sub>2</sub> coating                                                        | 4    | 0.5C   |
| 5   | polycrystal    | Core-Shell                                                                                    | 5    | 0.5C   |
| 6   | polycrystal    | Al <sub>2</sub> O <sub>3</sub> coating                                                        | 6    | 1C     |
| 7   | polycrystal    | LiAlO <sub>2</sub> /Li <sub>2</sub> SiO <sub>3</sub> coating                                  | 7    | 1C     |
| 8   | polycrystal    | MgO coating                                                                                   | 8    | 1C     |
| 9   | polycrystal    | Carbonized Polymer Dots coating                                                               | 9    | 0.5C   |
| 10  | polycrystal    | Ag coating                                                                                    | 10   | 1C     |
| 11  | single crystal | Ti-doping                                                                                     | 11   | 0.2C   |
| 12  | single crystal | Zr doping                                                                                     | 12   | 0.2C   |
| 13  | polycrystal    | SiO <sub>2</sub> coating                                                                      | 13   | 0.2C   |
| 14  | polycrystal    | Sb-doped Zn <sub>2</sub> SnO <sub>4</sub>                                                     | 14   | 1C     |
| 15  | polycrystal    | Ti doping                                                                                     | 15   | 1C     |
| 16  | polycrystal    | PANI-PVP coating                                                                              | 16   | 1C     |
| 17  | polycrystal    | LiNbO <sub>3</sub> coating                                                                    | 17   | 1C     |
| 18  | polycrystal    | LiPF <sub>6</sub> doping                                                                      | 18   | 1C     |
| 19  | single crystal | Li <sub>3</sub> PO <sub>4</sub> -AlPO <sub>4</sub> -Al(PO <sub>3</sub> ) <sub>3</sub> coating | 19   | 0.5C   |
| 20  | polycrystal    | MXene (Ti <sub>2</sub> C <sub>3</sub> T <sub>x</sub> ) modification                           | 20   | 0.5C   |

## References

1. J. Song, L. Huang, G. Yang, T. Liu, S. Liu, G. Cong, Y. Huang, Z. Liu, X. Gao and L. Geng, *Small Methods*, 2023, 2301400.
2. S.-J. Sim, S.-H. Lee, B.-S. Jin and H.-S. Kim, *Scientific Reports*, 2020, **10**, 11114.
3. H. Sun, J. Wang, Q. Liu, Y. Zhang, D. Zhang, Q. Wang, Z. Li, W. Li and B. Wang, *Journal of Alloys and Compounds*, 2021, **850**, 156763.
4. X. Liu, Q. Chen, Y. Li, C. Chen, W. Zeng, M. Yuan, R. Wang and S. Xiao, *Journal of The Electrochemical Society*, 2019, **166**, A3480.
5. L. Xu, C. Tian, C. Bao, J. Zhao and X. Leng, *Energies*, 2023, **16**, 4149.
6. J. Wang, Q. Yuan, R. Wang, G. Tan, Y. Su, D. Li and F. Wu, 2020.
7. X. He, H. Luo, K. Yong, M. Yao and Y. Zhang, *Journal of Energy Storage*, 2023, **70**, 107872.
8. F. Ma, Y. Wu, G. Wei, S. Qiu and J. Qu, *Journal of Solid State Electrochemistry*, 2019, **23**, 2213-2224.
9. L. Li, Y. Zhang, N. Hu, K. Wang, Y. Liu, X. Wang, X. Zhou, J. Ma and G. Cui, *Advanced Materials Interfaces*, 2023, **10**, 2300254.
10. H. Sun, Y. Zhang, W. Li, D. Zhang, Q. Wang and B. Wang, *Electrochimica Acta*, 2019, **327**, 135054.
11. F. Zhang, K. Wu, L. Zhang, X. Hu, K. Yu, C. Liang and W. Jin, *Ionics*, 2021, **27**, 2367-2380.
12. S. Gao, X. Zhan and Y.-T. Cheng, *Journal of Power Sources*, 2019, **410**, 45-52.
13. L. Dou, P. Hu, C. Shang, H. Wang, D. Xiao, U. Ahuja, K. Aifantis, Z. Zhang and Z. Huang, *ChemElectroChem*, 2021, **8**, 4321-4327.
14. M.-d. Zhu, H.-l. Zhu, J.-m. Guo, C.-c. Lu, Y. Ji, J. Hu, X.-x. Tan and Z.-y. Chen, *Ionics*, 2023, **29**, 1711-1720.
15. H. Sun, Z. Cao, T. Wang, R. Lin, Y. Li, X. Liu, L. Zhang, F. Lin, Y. Huang and W. Luo, *Materials Today Energy*, 2019, **13**, 145-151.
16. Q. Gan, N. Qin, Y. Zhu, Z. Huang, F. Zhang, S. Gu, J. Xie, K. Zhang, L. Lu and Z. Lu, *ACS applied materials & interfaces*, 2019, **11**, 12594-12604.
17. P. He, M. Zhang, J. Wu, Y. Li, Y. Wang, Y. Yan, D. Zhang and X. Sun, *Journal of Alloys and Compounds*, 2023, **967**, 171822.
18. A. Yuan, H. Tang, L. Liu, J. Ying, L. Tan, L. Tan and R. Sun, *Journal of Alloys and Compounds*, 2020, **844**, 156210.
19. Z. Feng, R. Rajagopalan, D. Sun, Y. Tang and H. Wang, *Chemical Engineering Journal*, 2020, **382**, 122959.
20. S.-Y. Liao, X.-W. Huang, Q.-S. Rao, Y.-Z. Li, J.-Q. Hu, F. Zheng, Z.-Y. Ma, T.-T. Cui, Y.-D. Liu and Y.-G. Min, *Journal of Materials Chemistry A*, 2020, **8**, 4494-4504.
